# Supplementary material for: Partitioning the lung field based on the depth ratio in three-dimensional space
Source: PubMed Central journal article supplement — Transl Lung Cancer Res. 2022 Jun;11(6):1165–75. doi: 10.21037/tlcr-22-391 (PMC9271427; doi:10.21037/tlcr-22-391), 2022-06
Supplement: tlcr-11-06-1165-supplementary.pdf [file tlcr-11-06-1165-supplementary.pdf]

**Table S1** The specific distribution of pulmonary nodules

| RUL (n)                           |    | RML (n)         |   | RLL (n)                                            |    | LUL (n)                               |    | LLL (n)                           |    |
|-----------------------------------|----|-----------------|---|----------------------------------------------------|----|---------------------------------------|----|-----------------------------------|----|
| S <sup>1</sup>                    | 10 | S <sup>4</sup>  | 2 | S <sup>6</sup>                                     | 21 | S <sup>1+2</sup>                      | 13 | S <sup>6</sup>                    | 21 |
| S <sup>1+2</sup> a                | 2  | <b>Total =2</b> |   | S <sup>6</sup> +S <sup>8</sup> a                   | 1  | S <sup>1+2</sup> a+b                  | 9  | S <sup>6</sup> +S <sup>8</sup> a  | 1  |
| S <sup>1</sup> a+S <sup>2</sup>   | 1  |                 |   | S <sup>6</sup> b                                   | 1  | S <sup>1+2</sup> a+b+S <sup>3</sup> c | 3  | S <sup>7</sup> +S <sup>8</sup> b  | 1  |
| S <sup>1</sup> a+S <sup>2</sup> a | 3  |                 |   | S <sup>6</sup> b+S <sup>8</sup> a                  | 1  | S <sup>1+2</sup> b+c                  | 4  | S <sup>8</sup>                    | 4  |
| S <sup>1</sup> b                  | 1  |                 |   | S <sup>6</sup> b+S <sup>9</sup> a                  | 1  | S <sup>1+2</sup> a                    | 1  | S <sup>8</sup> a+S <sup>9</sup> a | 1  |
| S <sup>1</sup> b+S <sup>3</sup>   | 3  |                 |   | S <sup>6</sup> +S <sup>9</sup> a+S <sup>10</sup> a | 1  | S <sup>1+2</sup> a+S <sup>3</sup> c   | 4  | S <sup>8</sup> b                  | 3  |
| S <sup>1</sup> b+S <sup>3</sup> b | 1  |                 |   | S <sup>7</sup> +S <sup>8</sup> b                   | 1  | S <sup>1+2</sup> b                    | 1  | S <sup>9</sup>                    | 1  |
| S <sup>2</sup>                    | 14 |                 |   | S <sup>8</sup>                                     | 2  | S <sup>1+2</sup> c                    | 2  | <b>Total =32</b>                  |    |
| S <sup>2</sup> a                  | 1  |                 |   | S <sup>8</sup> +S <sup>9</sup> a                   | 2  | S <sup>1+2</sup> c+S <sup>3</sup> a   | 2  |                                   |    |
| S <sup>2</sup> b                  | 3  |                 |   | S <sup>8</sup> a                                   | 3  | S <sup>3</sup>                        | 2  |                                   |    |
| S <sup>2</sup> b+S <sup>3</sup>   | 1  |                 |   | S <sup>8</sup> a+S <sup>9</sup>                    | 1  | S <sup>3</sup> a+b                    | 2  |                                   |    |
| S <sup>2</sup> b+S <sup>3</sup> a | 15 |                 |   | S <sup>8</sup> a+S <sup>9</sup> a                  | 1  | S <sup>3</sup> a+b+S <sup>4</sup> b   | 1  |                                   |    |
| S <sup>3</sup>                    | 11 |                 |   | S <sup>8</sup> b                                   | 1  | S <sup>3</sup> b+c                    | 7  |                                   |    |
| S <sup>3</sup> a                  | 1  |                 |   | S <sup>9</sup>                                     | 2  | S <sup>3</sup> a                      | 1  |                                   |    |
| S <sup>3</sup> a+b                | 1  |                 |   | <b>Total =39</b>                                   |    | S <sup>3</sup> a+S <sup>4</sup> a     | 1  |                                   |    |
| S <sup>3</sup> b                  | 10 |                 |   |                                                    |    | S <sup>3</sup> b+S <sup>4</sup> b     | 2  |                                   |    |
| <b>Total =78</b>                  |    |                 |   |                                                    |    | S <sup>3</sup> c                      | 2  |                                   |    |
|                                   |    |                 |   |                                                    |    | S <sup>4</sup> a                      | 1  |                                   |    |
|                                   |    |                 |   |                                                    |    | <b>Total =58</b>                      |    |                                   |    |

RUL, right upper lung; RML, right middle lung; RLL, right lower lung; LUL, left upper lung; LLL, left lower lung.

**Table S2** Partition results of the chest group, lobar group, and symmetrical 3 sectors group

| Group                           | Inner | Middle | Outer | Total | λ     | P value |
|---------------------------------|-------|--------|-------|-------|-------|---------|
| The chest group                 | 0     | 48     | 161   | 209   | 7.234 | 0.124   |
| The lobar group                 | 1     | 62     | 146   | 209   |       |         |
| The symmetrical 3 sectors group | 1     | 69     | 139   | 209   |       |         |

P values are reported by the likelihood ratio test.

**Table S3** The specific distribution of nodules is disturbed by mediastinum

| Group                           | LUL      | LLL      | RUL      | RML     | RLL     | Total      |
|---------------------------------|----------|----------|----------|---------|---------|------------|
| The chest group                 | 58 (40%) | 27 (19%) | 48 (33%) | 1 (1%)  | 11 (7%) | 145 (100%) |
| The lobar group                 | 47 (85%) | 4(7%)    | 1 (2%)   | 1 (2%)  | 2 (4%)  | 55 (100%)  |
| The symmetrical 3 sectors group | 3 (30%)  | 3 (30%)  | 1 (10%)  | 1 (10%) | 2 (20%) | 10 (100%)  |

RUL, right upper lung; RML, right middle lung; RLL, right lower lung; LUL, left upper lung; LLL, left lower lung.
